# Supplementary material
Source: PubMed Central journal article supplement (PMC7210720)
Supplement: mmc1.pdf [file mmc1.pdf]

YMTHE, Volume 28

## Supplemental Information

### **AAV Capsid-Promoter Interactions Determine CNS Cell-Selective Gene Expression *In Vivo***

Sara K. Powell, R. Jude Samulski, and Thomas J. McCown

**Supplemental Figure 1**

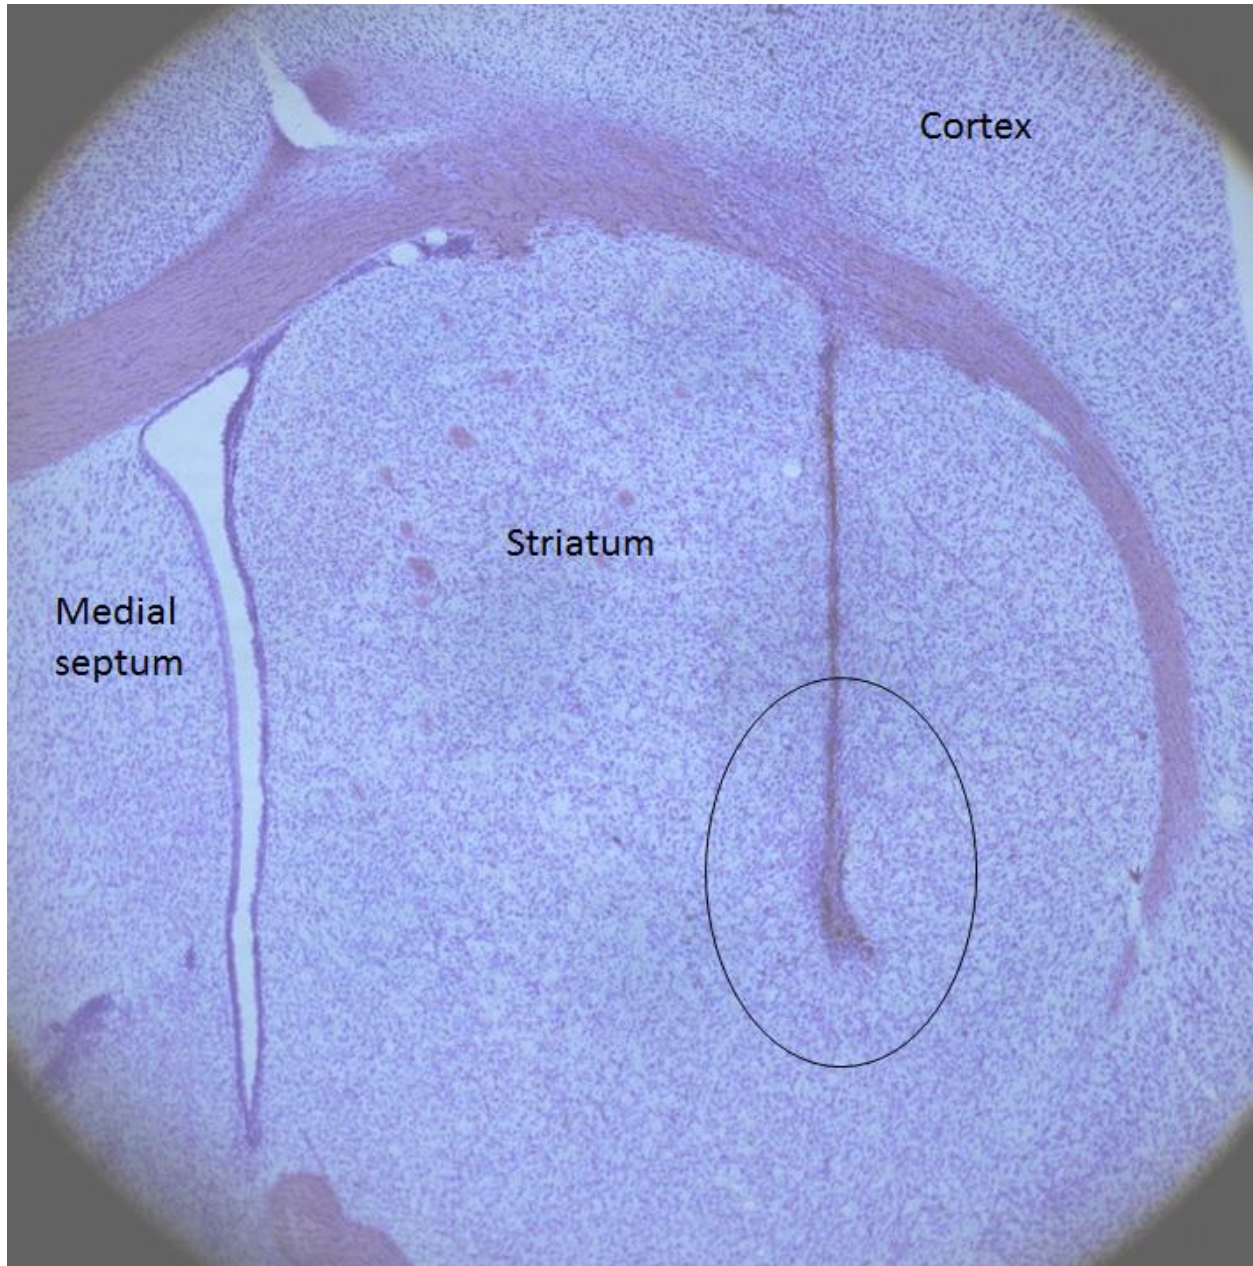

**Supplemental Figure 1:** A cresyl violet nissl stained section through the rat striatum where the oval outline indicates the range of AAV vector infusions.

## Supplemental Figure 2

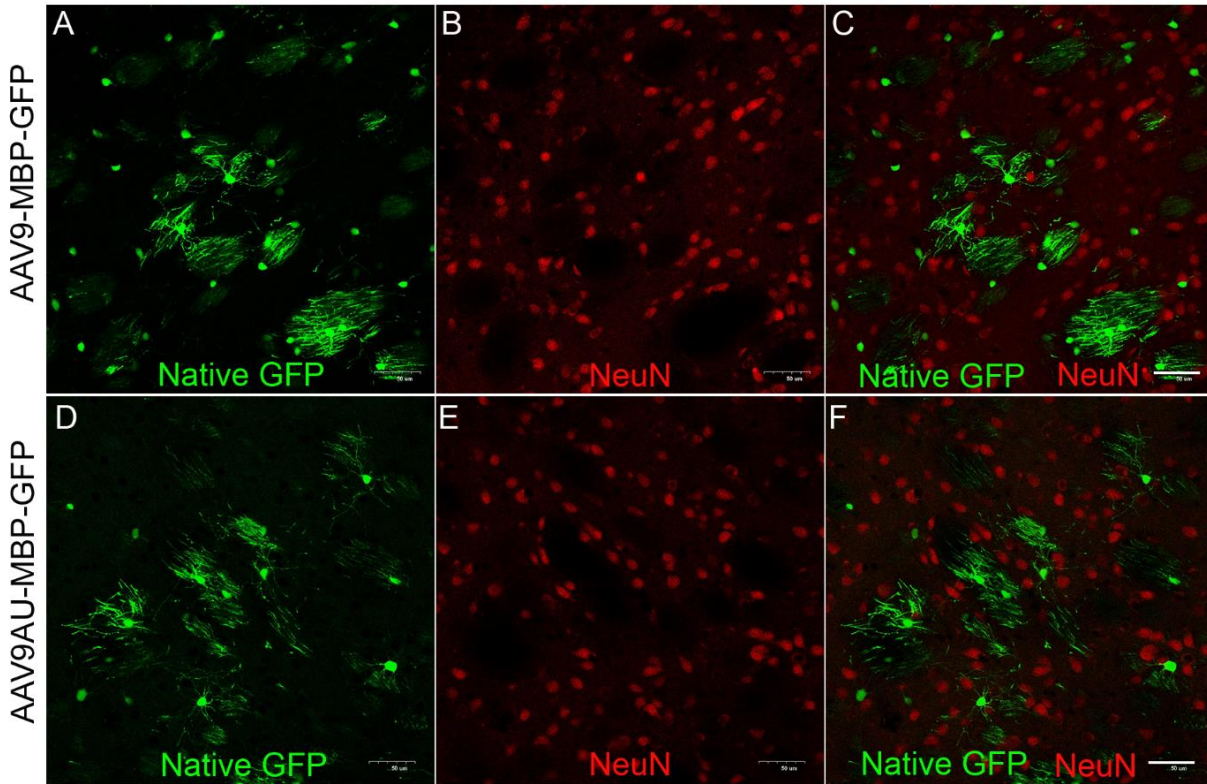

**Supplemental Figure 2:** Representative confocal images of AAV9-MBP-GFP (N=2) and AAV9AU-MBP-GFP (N=2) gene expression in the rat striatum. Scale bars, 50 µm.

### Supplemental Figure 3

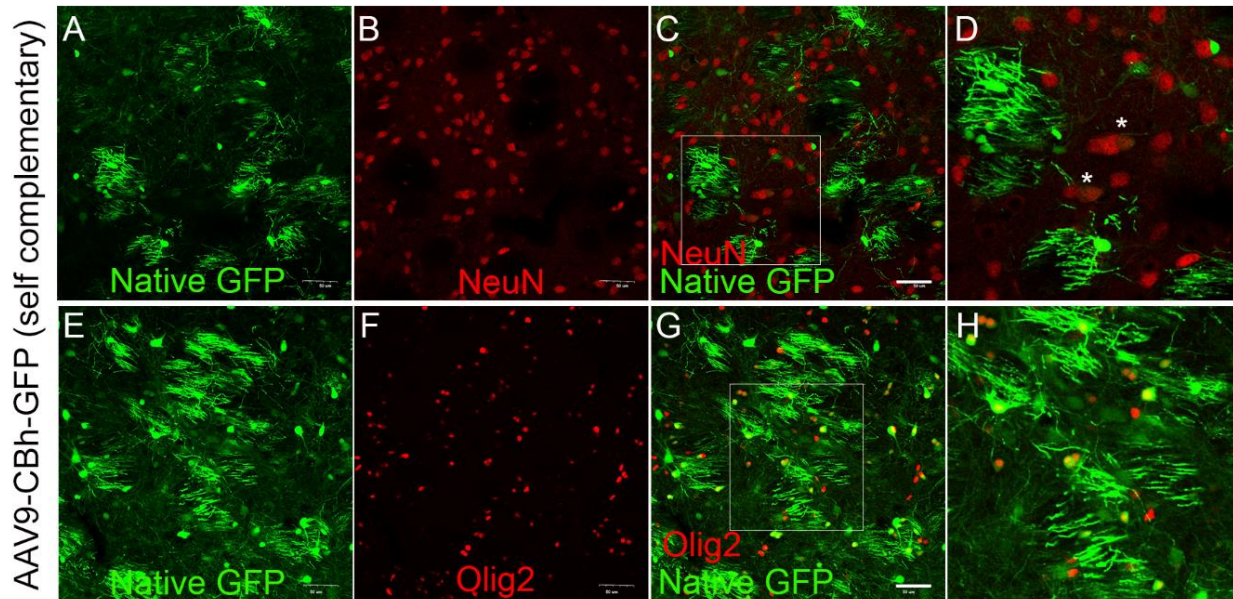

**Supplemental Figure 3:** Representative confocal images of self-complementary AAV9-CBh-GFP (N=2) gene expression in the rat striatum. The asterisks indicate co-localization of GFP and NeuN containing cells. Scale bars, 50  $\mu$ m.
